# Supplementary material for: NSCLC Digital PCR Panel Returns Low-Input Sample Results Where Sequencing Fails
Source: MDPI journal article supplement (doi:10.3390/diagnostics14030243), 2024-01-24
Supplement: s1 [file s1]

**Table S1. Sample Demographics**

| ID      | TSO 500 Result                    | Source       | Nucleated Cells per slide | Tissue Surface Area (mm <sup>2</sup> ) | Tumor per-cent | Age     | Gender | DIN | RIN |
|---------|-----------------------------------|--------------|---------------------------|----------------------------------------|----------------|---------|--------|-----|-----|
| CC00-01 | ALK Fusion                        | Lung         | > 5000                    | 162                                    | 60             | 58      | M      | 1.9 | 2.1 |
| CC00-02 | ALK Fusion                        | Lung         | 3500                      | 66                                     | 65             | 67      | F      | 2   | 2   |
| CC00-04 | EGFR exon 19 Deletion             | Lung         | 30000                     | 150                                    | 100            | 66      | M      | 2   | 1.3 |
| CC00-05 | EGFR S768I, EGFR G719X            | Lung         | > 5000                    | 85                                     | 85             | 67      | F      | 2.6 | 1   |
| CC00-06 | EGFR exon 20 Insertion            | Lung         | Unknown                   | Unknown                                | Unknown        | 35      | M      | 2.1 | 2.8 |
| CC00-07 | EGFR exon 20 Insertion            | Lung         | Unknown                   | Unknown                                | Unknown        | 35      | M      | 2.1 | 1.3 |
| CC00-08 | KRAS G12C                         | Lung         | 3500                      | 55                                     | 75             | 68      | M      | 1.5 | 2   |
| CC00-09 | EGFR S768I, EGFR L858R            | Lung         | > 5000                    | 220                                    | 80             | 41      | F      | 2.6 | 1.2 |
| CC00-10 | EGFR T790M, EGFR L858R            | Lung         | 2500                      | 72                                     | 50             | 69      | M      | 2.2 | 1.7 |
| CC00-11 | EGFR L858R                        | Lung         | 2500                      | 48                                     | 50             | 68      | F      | 2.4 | 1.7 |
| CC00-14 | MET exon14 skipping               | Lung         | 2500                      | 91                                     | 65             | 66      | M      | 3.4 | 1.6 |
| CC00-15 | RET Fusion                        | Lung         | > 5000                    | 30                                     | 95             | Unknown | M      | 2.1 | 1.2 |
| CC00-16 | RET Fusion                        | Thyroid      | > 5000                    | 96                                     | 70             | 32      | F      | 2.3 | 1.1 |
| CC00-17 | ROS Fusion                        | Lung         | > 5000                    | 72                                     | 80             | 69      | M      | 2.9 | 1.5 |
| CC00-18 | ROS Fusion                        | Lung         | > 5000                    | 48                                     | 80             | 54      | F      | 2.3 | 2.6 |
| CC00-19 | EGFR S768I, EGFR G719X            | Lung         | 3000                      | 150                                    | 80             | 56      | M      | 1.9 | 2   |
| CC00-20 | EGFR T790M, BRAF V600E            | HD Reference | N/A                       | N/A                                    | N/A            | N/A     | N/A    | 7.2 | 1   |
| CC00-21 | EGFR L858R, BRAF V600E            | HD Reference | N/A                       | N/A                                    | N/A            | N/A     | N/A    | 6.9 | 1.3 |
| CC00-22 | ALK, RET, ROS Fusion              | HD Reference | N/A                       | N/A                                    | N/A            | N/A     | N/A    | 6.5 | 2.7 |
| CC00-23 | EGFR G719X, KRAS G12C             | HD Reference | N/A                       | N/A                                    | N/A            | N/A     | N/A    | 6.8 | 3.1 |
| CC00-24 | EGFR S768I, BRAF V600E            | HD Reference | N/A                       | N/A                                    | N/A            | N/A     | N/A    | 6.8 | 1.5 |
| CC00-25 | EGFR exon 19 Deletion, BRAF V600E | HD Reference | N/A                       | N/A                                    | N/A            | N/A     | N/A    | 7.3 | 1   |
| CC00-N2 | none                              | Lung         | Unknown                   | Unknown                                | 0              | 79      | F      | 3.4 | 1.2 |
| CC00-N4 | none                              | Lung         | Unknown                   | Unknown                                | 0              | 61      | F      | 5.6 | 1.1 |
| CC00-N5 | none                              | Lung         | Unknown                   | Unknown                                | 0              | 70      | F      | 5   | 1   |
| CC00-N6 | none                              | Lung         | Unknown                   | Unknown                                | 0              | 72      | F      | 6.4 | 1.6 |
| CC00-N7 | none                              | Lung         | Unknown                   | Unknown                                | 0              | 34      | M      | 3.7 | 1   |
| L-1242  | none                              | Tonsil       | Unknown                   | 234                                    | 0              | 42      | M      | N/A | N/A |
| L-1243  | none                              | Appendix     | Unknown                   | 72                                     | 0              | 55      | M      | N/A | N/A |
| L-1244  | none                              | Tonsil       | Unknown                   | 150                                    | 0              | 36      | F      | N/A | N/A |

Table S2. Established cutoffs for each well in the HDPCR NSCLC Panel.

| Target                             | Counts |
|------------------------------------|--------|
| DNA Well 1                         |        |
| EGFR EXON 19 (Internal Control)    | 50     |
| EGFR Exon 19 Deletion (EGFR DEL)   | 15     |
| EGFR S768I                         | 20     |
| EGFR L858R                         | 20     |
| BRAF V600E                         | 10     |
| EGFR T790M                         | 10     |
| DNA Well 2                         |        |
| EGFR EXON 20 (Internal Control)    | 100    |
| KRAS G12C                          | 10     |
| EGFR L861Q                         | 10     |
| ERBB2 Exon 20 Insertions (ERBB2)   | 10     |
| GFR G719                           | 20     |
| EGFR Exon 20 Insertions (EGFR INS) | 40     |
| RNA Well                           |        |
| HPRT1 (Internal Control)           | 50     |
| ALK                                | 15     |
| ROS1                               | 40     |
| RET                                | 15     |
| NTRK                               | 50     |
| MET                                | 40     |

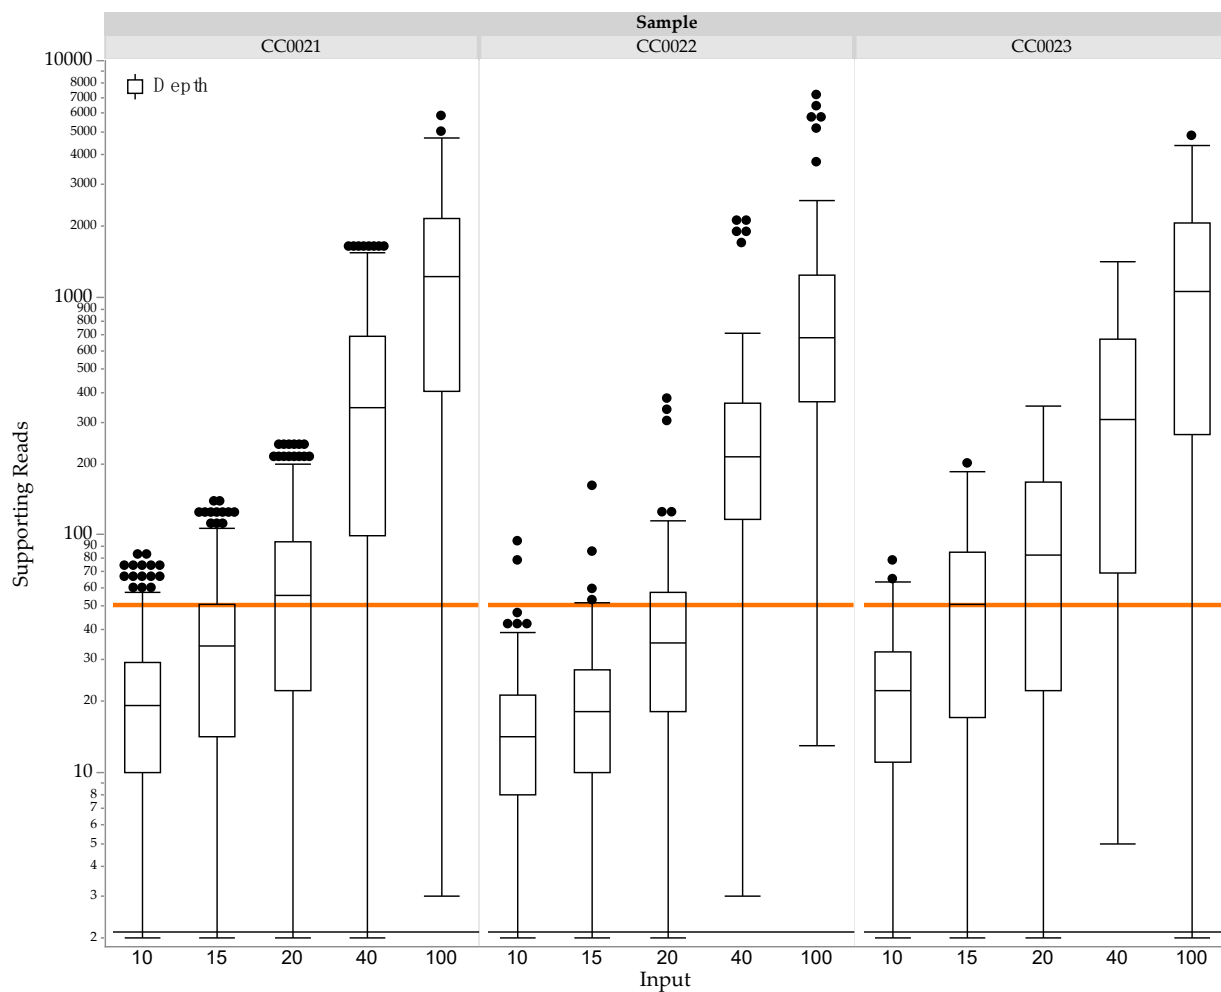

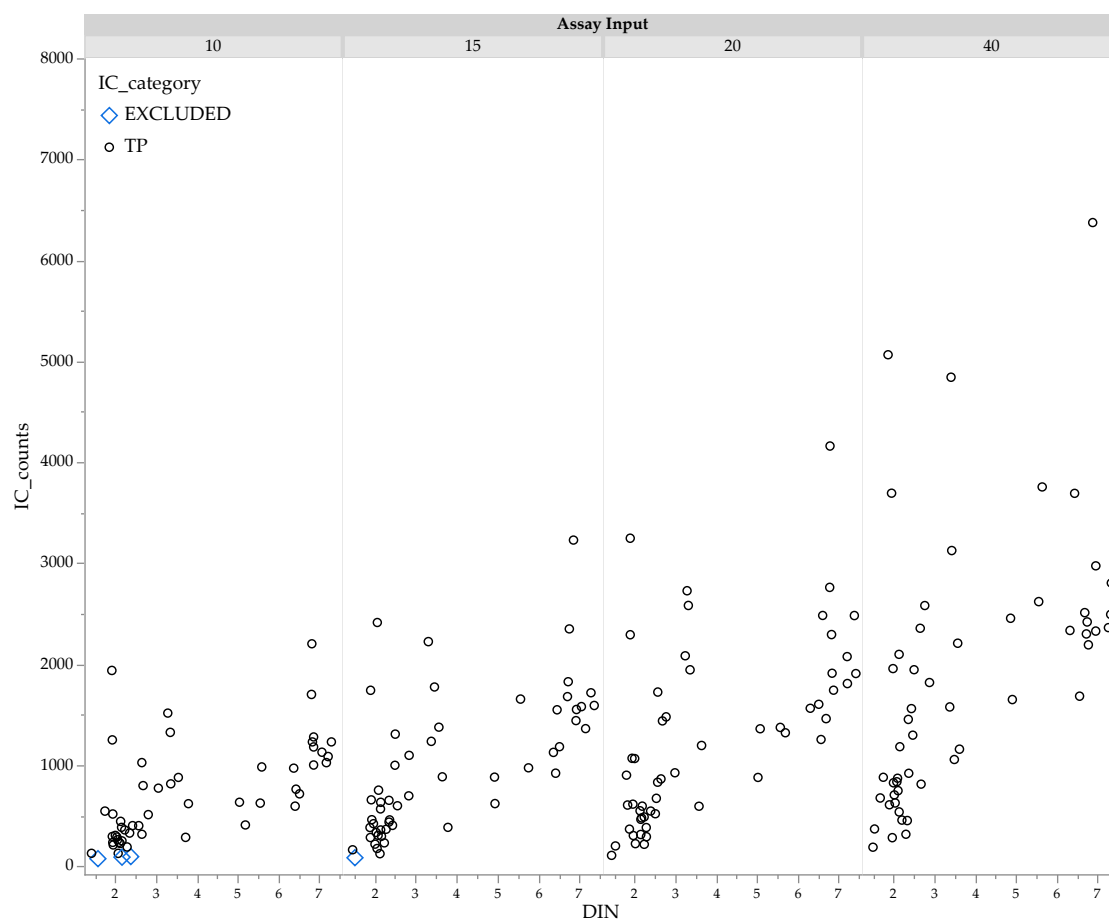

Figure S2. IC counts vs. DIN at varying inputs for reference and biological samples. Blue diamonds represent samples that were excluded from further analysis because they were below the IC threshold for DNA.

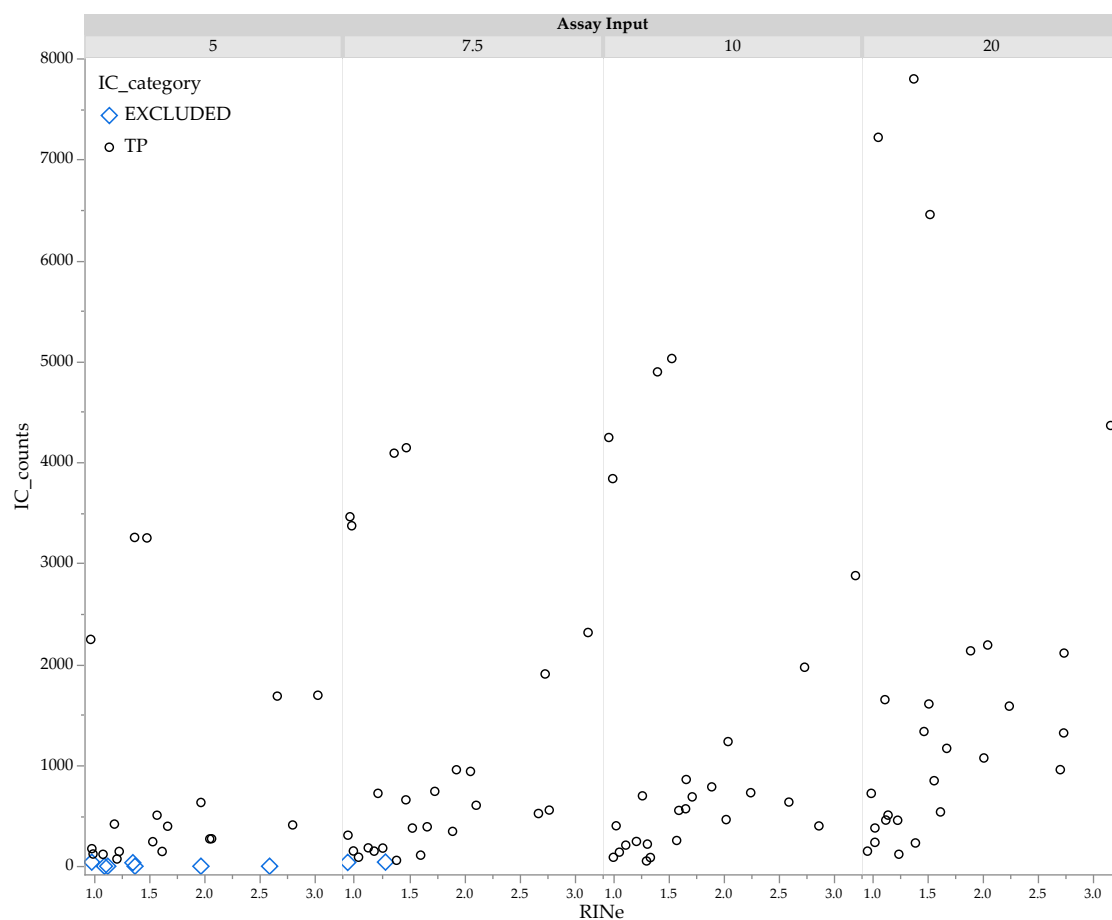

Figure S3. IC counts vs. RIN at varying inputs for reference and biological samples. Blue diamonds represent samples that were excluded from further analysis because they were below the IC threshold for DNA.

**Table S3. Reference and biological specimen concordance data reported by target for the TSO500 Assay at 100 ng input and the HDPCR NSCLC Panel for each target.** True Positive (TP), True Negative (TN), False Positive (FP), False Negative (FN), Positive Percent Agreement (PPA), Positive Predictive Value (PPV), Negative Predictive Value (NPV), and Negative Percent Agreement (NPA). Count cutoffs for HDPCR are listed in Table S2. Wells excluded did not meet the IC requirements for NSCLC HDPCR (50 IC counts Well 1/Well 3 and 100 IC counts Well 2). One DNA sample and one RNA sample did not receive a TSO500 result and were removed from further analysis.

| call       | 40/20 ng  |    |    |    |          |          |      |      |      |      |            |    |    |    |          |          |      |      |      |      |
|------------|-----------|----|----|----|----------|----------|------|------|------|------|------------|----|----|----|----------|----------|------|------|------|------|
|            | Reference |    |    |    |          |          |      |      |      |      | Biological |    |    |    |          |          |      |      |      |      |
|            | TP        | TN | FP | FN | Excluded | Accuracy | PPA  | NPA  | PPV  | NPV  | TP         | TN | FP | FN | Excluded | Accuracy | PPA  | NPA  | PPV  | NPV  |
| ALK        | 1         | 5  | 0  | 0  | 0        | 1.00     | 1.00 | 1.00 | 1.00 | 1.00 | 2          | 21 | 0  | 0  | 0        | 1.00     | 1.00 | 1.00 | 1.00 | 1.00 |
| BRAF V600E | 4         | 2  | 0  | 0  | 0        | 1.00     | 1.00 | 1.00 | 1.00 | 1.00 | 0          | 23 | 0  | 0  | 0        | 1.00     | -    | 1.00 | -    | 1.00 |
| EGFR DEL   | 1         | 5  | 0  | 0  | 0        | 1.00     | 1.00 | 1.00 | 1.00 | 1.00 | 1          | 22 | 0  | 0  | 0        | 1.00     | 1.00 | 1.00 | 1.00 | 1.00 |
| EGFR G719  | 1         | 5  | 0  | 0  | 0        | 1.00     | 1.00 | 1.00 | 1.00 | 1.00 | 2          | 21 | 0  | 0  | 0        | 1.00     | 1.00 | 1.00 | 1.00 | 1.00 |
| EGFR INS   | 0         | 6  | 0  | 0  | 0        | 1.00     | -    | 1.00 | -    | 1.00 | 2          | 21 | 0  | 0  | 0        | 1.00     | 1.00 | 1.00 | 1.00 | 1.00 |
| EGFR L858R | 1         | 5  | 0  | 0  | 0        | 1.00     | 1.00 | 1.00 | 1.00 | 1.00 | 3          | 20 | 0  | 0  | 0        | 1.00     | 1.00 | 1.00 | 1.00 | 1.00 |
| EGFR L861Q | 0         | 6  | 0  | 0  | 0        | 1.00     | -    | 1.00 | -    | 1.00 | 0          | 23 | 0  | 0  | 0        | 1.00     | -    | 1.00 | -    | 1.00 |
| EGFR S768I | 1         | 5  | 0  | 0  | 0        | 1.00     | 1.00 | 1.00 | 1.00 | 1.00 | 3          | 20 | 0  | 0  | 0        | 1.00     | 1.00 | 1.00 | 1.00 | 1.00 |
| EGFR T790M | 1         | 5  | 0  | 0  | 0        | 1.00     | 1.00 | 1.00 | 1.00 | 1.00 | 1          | 22 | 0  | 0  | 0        | 1.00     | 1.00 | 1.00 | 1.00 | 1.00 |
| ERBB2      | 0         | 6  | 0  | 0  | 0        | 1.00     | -    | 1.00 | -    | 1.00 | 0          | 23 | 0  | 0  | 0        | 1.00     | -    | 1.00 | -    | 1.00 |
| KRAS G12C  | 1         | 5  | 0  | 0  | 0        | 1.00     | 1.00 | 1.00 | 1.00 | 1.00 | 1          | 22 | 0  | 0  | 0        | 1.00     | 1.00 | 1.00 | 1.00 | 1.00 |
| MET        | 0         | 6  | 0  | 0  | 0        | 1.00     | -    | 1.00 | -    | 1.00 | 1          | 22 | 0  | 0  | 0        | 1.00     | 1.00 | 1.00 | 1.00 | 1.00 |
| NTRK       | 0         | 6  | 0  | 0  | 0        | 1.00     | -    | 1.00 | -    | 1.00 | 0          | 23 | 0  | 0  | 0        | 1.00     | -    | 1.00 | -    | 1.00 |
| RET        | 1         | 5  | 0  | 0  | 0        | 1.00     | 1.00 | 1.00 | 1.00 | 1.00 | 2          | 21 | 0  | 0  | 0        | 1.00     | 1.00 | 1.00 | 1.00 | 1.00 |
| ROS1       | 1         | 5  | 0  | 0  | 0        | 1.00     | 1.00 | 1.00 | 1.00 | 1.00 | 2          | 21 | 0  | 0  | 0        | 1.00     | 1.00 | 1.00 | 1.00 | 1.00 |

| 20/10 ng   |           |    |    |    |          |          |      |      |      |      |            |    |    |     |          |          |      |      |      |      |
|------------|-----------|----|----|----|----------|----------|------|------|------|------|------------|----|----|-----|----------|----------|------|------|------|------|
| call       | Reference |    |    |    |          |          |      |      |      |      | Biological |    |    |     |          |          |      |      |      |      |
|            | TP        | TN | FP | FN | Excluded | Accuracy | PPA  | NPA  | PPV  | NPV  | TP         | TN | FP | FN  | Excluded | Accuracy | PPA  | NPA  | PPV  | NPV  |
| ALK        | 1         | 5  | 0  | 0  | 0        | 1.00     | 1.00 | 1.00 | 1.00 | 1.00 | 1          | 20 | 0  | 1 * | 1        | 0.95     | 0.50 | 1.00 | 1.00 | 0.95 |
| BRAF V600E | 4         | 2  | 0  | 0  | 0        | 1.00     | 1.00 | 1.00 | 1.00 | 1.00 | 0          | 23 | 0  | 0   | 0        | 1.00     | -    | 1.00 | -    | 1.00 |
| EGFR DEL   | 1         | 5  | 0  | 0  | 0        | 1.00     | 1.00 | 1.00 | 1.00 | 1.00 | 1          | 22 | 0  | 0   | 0        | 1.00     | 1.00 | 1.00 | 1.00 | 1.00 |
| EGFR G719  | 1         | 5  | 0  | 0  | 0        | 1.00     | 1.00 | 1.00 | 1.00 | 1.00 | 2          | 21 | 0  | 0   | 0        | 1.00     | 1.00 | 1.00 | 1.00 | 1.00 |
| EGFR INS   | 0         | 6  | 0  | 0  | 0        | 1.00     | -    | 1.00 | -    | 1.00 | 2          | 21 | 0  | 0   | 0        | 1.00     | 1.00 | 1.00 | 1.00 | 1.00 |
| EGFR L858R | 1         | 5  | 0  | 0  | 0        | 1.00     | 1.00 | 1.00 | 1.00 | 1.00 | 3          | 20 | 0  | 0   | 0        | 1.00     | 1.00 | 1.00 | 1.00 | 1.00 |
| EGFR L861Q | 0         | 6  | 0  | 0  | 0        | 1.00     | -    | 1.00 | -    | 1.00 | 0          | 23 | 0  | 0   | 0        | 1.00     | -    | 1.00 | -    | 1.00 |
| EGFR S768I | 1         | 5  | 0  | 0  | 0        | 1.00     | 1.00 | 1.00 | 1.00 | 1.00 | 3          | 20 | 0  | 0   | 0        | 1.00     | 1.00 | 1.00 | 1.00 | 1.00 |
| EGFR T790M | 1         | 5  | 0  | 0  | 0        | 1.00     | 1.00 | 1.00 | 1.00 | 1.00 | 1          | 22 | 0  | 0   | 0        | 1.00     | 1.00 | 1.00 | 1.00 | 1.00 |
| ERBB2      | 0         | 6  | 0  | 0  | 0        | 1.00     | -    | 1.00 | -    | 1.00 | 0          | 23 | 0  | 0   | 0        | 1.00     | -    | 1.00 | -    | 1.00 |
| KRAS G12C  | 1         | 5  | 0  | 0  | 0        | 1.00     | 1.00 | 1.00 | 1.00 | 1.00 | 1          | 22 | 0  | 0   | 0        | 1.00     | 1.00 | 1.00 | 1.00 | 1.00 |
| MET        | 0         | 6  | 0  | 0  | 0        | 1.00     | -    | 1.00 | -    | 1.00 | 1          | 21 | 0  | 0   | 1        | 1.00     | 1.00 | 1.00 | 1.00 | 1.00 |
| NTRK       | 0         | 6  | 0  | 0  | 0        | 1.00     | -    | 1.00 | -    | 1.00 | 0          | 22 | 0  | 0   | 1        | 1.00     | -    | 1.00 | -    | 1.00 |
| RET        | 1         | 5  | 0  | 0  | 0        | 1.00     | 1.00 | 1.00 | 1.00 | 1.00 | 2          | 20 | 0  | 0   | 1        | 1.00     | 1.00 | 1.00 | 1.00 | 1.00 |
| ROS1       | 1         | 5  | 0  | 0  | 0        | 1.00     | 1.00 | 1.00 | 1.00 | 1.00 | 2          | 20 | 0  | 0   | 1        | 1.00     | 1.00 | 1.00 | 1.00 | 1.00 |

| 15/7.5 ng  |           |    |    |    |           |           |      |      |      |      |            |    |    |    |           |           |      |      |      |      |
|------------|-----------|----|----|----|-----------|-----------|------|------|------|------|------------|----|----|----|-----------|-----------|------|------|------|------|
| call       | Reference |    |    |    |           |           |      |      |      |      | Biological |    |    |    |           |           |      |      |      |      |
|            | TP        | TN | FP | FN | Ex-cluded | Accu-racy | PPA  | NPA  | PPV  | NPV  | TP         | TN | FP | FN | Ex-cluded | Accu-racy | PPA  | NPA  | PPV  | NPV  |
| ALK        | 1         | 5  | 0  | 0  | 0         | 1.00      | 1.00 | 1.00 | 1.00 | 1.00 | 2          | 19 | 0  | 0  | 2         | 1.00      | 1.00 | 1.00 | 1.00 | 1.00 |
| BRAF V600E | 4         | 2  | 0  | 0  | 0         | 1.00      | 1.00 | 1.00 | 1.00 | 1.00 | 0          | 23 | 0  | 0  | 0         | 1.00      | -    | 1.00 | -    | 1.00 |

|            |   |   |   |   |   |      |      |      |      |      |   |    |   |   |   |      |      |      |      |      |
|------------|---|---|---|---|---|------|------|------|------|------|---|----|---|---|---|------|------|------|------|------|
| EGFR DEL   | 1 | 5 | 0 | 0 | 0 | 1.00 | 1.00 | 1.00 | 1.00 | 1.00 | 1 | 22 | 0 | 0 | 0 | 1.00 | 1.00 | 1.00 | 1.00 | 1.00 |
| EGFR G719  | 1 | 5 | 0 | 0 | 0 | 1.00 | 1.00 | 1.00 | 1.00 | 1.00 | 2 | 20 | 0 | 0 | 1 | 1.00 | 1.00 | 1.00 | 1.00 | 1.00 |
| EGFR INS   | 0 | 6 | 0 | 0 | 0 | 1.00 | -    | 1.00 | -    | 1.00 | 2 | 20 | 0 | 0 | 1 | 1.00 | 1.00 | 1.00 | 1.00 | 1.00 |
| EGFR L858R | 1 | 5 | 0 | 0 | 0 | 1.00 | 1.00 | 1.00 | 1.00 | 1.00 | 3 | 20 | 0 | 0 | 0 | 1.00 | 1.00 | 1.00 | 1.00 | 1.00 |
| EGFR L861Q | 0 | 6 | 0 | 0 | 0 | 1.00 | -    | 1.00 | -    | 1.00 | 0 | 22 | 0 | 0 | 1 | 1.00 | -    | 1.00 | -    | 1.00 |
| EGFR S768I | 1 | 5 | 0 | 0 | 0 | 1.00 | 1.00 | 1.00 | 1.00 | 1.00 | 3 | 20 | 0 | 0 | 0 | 1.00 | 1.00 | 1.00 | 1.00 | 1.00 |
| EGFR T790M | 1 | 5 | 0 | 0 | 0 | 1.00 | 1.00 | 1.00 | 1.00 | 1.00 | 1 | 22 | 0 | 0 | 0 | 1.00 | 1.00 | 1.00 | 1.00 | 1.00 |
| ERBB2      | 0 | 6 | 0 | 0 | 0 | 1.00 | -    | 1.00 | -    | 1.00 | 0 | 22 | 0 | 0 | 1 | 1.00 | -    | 1.00 | -    | 1.00 |
| KRAS G12C  | 1 | 5 | 0 | 0 | 0 | 1.00 | 1.00 | 1.00 | 1.00 | 1.00 | 0 | 22 | 0 | 0 | 1 | 1.00 | -    | 1.00 | -    | 1.00 |
| MET        | 0 | 6 | 0 | 0 | 0 | 1.00 | -    | 1.00 | -    | 1.00 | 1 | 20 | 0 | 0 | 2 | 1.00 | 1.00 | 1.00 | 1.00 | 1.00 |
| NTRK       | 0 | 6 | 0 | 0 | 0 | 1.00 | -    | 1.00 | -    | 1.00 | 0 | 21 | 0 | 0 | 2 | 1.00 | -    | 1.00 | -    | 1.00 |
| RET        | 1 | 5 | 0 | 0 | 0 | 1.00 | 1.00 | 1.00 | 1.00 | 1.00 | 2 | 19 | 0 | 0 | 2 | 1.00 | 1.00 | 1.00 | 1.00 | 1.00 |
| ROS1       | 1 | 5 | 0 | 0 | 0 | 1.00 | 1.00 | 1.00 | 1.00 | 1.00 | 2 | 19 | 0 | 0 | 2 | 1.00 | 1.00 | 1.00 | 1.00 | 1.00 |

| 10/5 ng    |           |    |    |    |           |           |      |      |      |      |            |    |    |                |           |           |      |      |      |      |
|------------|-----------|----|----|----|-----------|-----------|------|------|------|------|------------|----|----|----------------|-----------|-----------|------|------|------|------|
| call       | Reference |    |    |    |           |           |      |      |      |      | Biological |    |    |                |           |           |      |      |      |      |
|            | TP        | TN | FP | FN | Ex-cluded | Accu-racy | PPA  | NPA  | PPV  | NPV  | TP         | TN | FP | FN             | Ex-cluded | Accu-racy | PPA  | NPA  | PPV  | NPV  |
| ALK        | 1         | 4  | 0  | 0  | 1         | 1.00      | 1.00 | 1.00 | 1.00 | 1.00 | 0          | 13 | 0  | 2 <sup>b</sup> | 8         | 0.87      | 0.00 | 1.00 | -    | 0.87 |
| BRAF V600E | 4         | 2  | 0  | 0  | 0         | 1.00      | 1.00 | 1.00 | 1.00 | 1.00 | 0          | 23 | 0  | 0              | 0         | 1.00      | -    | 1.00 | -    | 1.00 |
| EGFR DEL   | 1         | 5  | 0  | 0  | 0         | 1.00      | 1.00 | 1.00 | 1.00 | 1.00 | 1          | 22 | 0  | 0              | 0         | 1.00      | 1.00 | 1.00 | 1.00 | 1.00 |
| EGFR G719  | 1         | 5  | 0  | 0  | 0         | 1.00      | 1.00 | 1.00 | 1.00 | 1.00 | 2          | 18 | 0  | 0              | 3         | 1.00      | 1.00 | 1.00 | 1.00 | 1.00 |
| EGFR INS   | 0         | 6  | 0  | 0  | 0         | 1.00      | -    | 1.00 | -    | 1.00 | 3          | 17 | 0  | 0              | 3         | 1.00      | 1.00 | 1.00 | 1.00 | 1.00 |
| EGFR L858R | 1         | 5  | 0  | 0  | 0         | 1.00      | 1.00 | 1.00 | 1.00 | 1.00 | 3          | 20 | 0  | 0              | 0         | 1.00      | 1.00 | 1.00 | 1.00 | 1.00 |
| EGFR L861Q | 0         | 6  | 0  | 0  | 0         | 1.00      | -    | 1.00 | -    | 1.00 | 0          | 20 | 0  | 0              | 3         | 1.00      | -    | 1.00 | -    | 1.00 |



|               |   |   |   |   |   |      |      |      |      |      |   |    |   |   |   |      |      |      |      |      |
|---------------|---|---|---|---|---|------|------|------|------|------|---|----|---|---|---|------|------|------|------|------|
| EGFR<br>S768I | 1 | 5 | 0 | 0 | 0 | 1.00 | 1.00 | 1.00 | 1.00 | 1.00 | 3 | 20 | 0 | 0 | 0 | 1.00 | 1.00 | 1.00 | 1.00 | 1.00 |
| EGFR<br>T790M | 1 | 5 | 0 | 0 | 0 | 1.00 | 1.00 | 1.00 | 1.00 | 1.00 | 1 | 22 | 0 | 0 | 0 | 1.00 | 1.00 | 1.00 | 1.00 | 1.00 |
| ERBB2         | 0 | 6 | 0 | 0 | 0 | 1.00 | -    | 1.00 | -    | 1.00 | 0 | 20 | 0 | 0 | 3 | 1.00 | -    | 1.00 | -    | 1.00 |
| KRAS<br>G12C  | 1 | 5 | 0 | 0 | 0 | 1.00 | 1.00 | 1.00 | 1.00 | 1.00 | 0 | 20 | 0 | 0 | 3 | 1.00 | -    | 1.00 | -    | 1.00 |
| MET           | 0 | 5 | 0 | 0 | 1 | 1.00 | -    | 1.00 | -    | 1.00 | 1 | 14 | 0 | 0 | 8 | 1.00 | 1.00 | 1.00 | 1.00 | 1.00 |
| NTRK          | 0 | 5 | 0 | 0 | 1 | 1.00 | -    | 1.00 | -    | 1.00 | 0 | 15 | 0 | 0 | 8 | 1.00 | -    | 1.00 | -    | 1.00 |
| RET           | 1 | 4 | 0 | 0 | 1 | 1.00 | 1.00 | 1.00 | 1.00 | 1.00 | 1 | 14 | 0 | 0 | 8 | 1.00 | 1.00 | 1.00 | 1.00 | 1.00 |
| ROS1          | 1 | 4 | 0 | 0 | 1 | 1.00 | 1.00 | 1.00 | 1.00 | 1.00 | 0 | 15 | 0 | 0 | 8 | 1.00 | -    | 1.00 | -    | 1.00 |

<sup>a</sup> CC00-02 55 ALK fusion reads on TSO500

<sup>b</sup> CC00-01 40 ALK reads fusion and CC00-02 55 ALK fusions reads on TSO 500

**Table S4. Contrived reference sample concordance data reported for the TSO500 Assay at 100 ng input vs. the HDPCR NSCLC Panel for DNA and RNA.** True Positive (TP), True Negative (TN), False Positive (FP), False Negative (FN), Positive Percent Agreement (PPA), Positive Predictive Value (PPV), Negative Predictive Value (NPV), and Negative Percent Agreement (NPA). Count cutoffs for HDPCR are listed in Table S2. Wells excluded did not meet the IC requirements for NSCLC HDPCR (50 IC counts Well 1/Well 3 and 100 IC counts Well 2). DNA samples are tested across two wells, with five targets in each well (Well 1 and Well 2).

| Input | DNA |    |    |    |                  | Accuracy | PPA  | NPA  | PPV  | NPV  |
|-------|-----|----|----|----|------------------|----------|------|------|------|------|
|       | TP  | TN | FP | FN | Excluded         |          |      |      |      |      |
| 40 ng | 10  | 50 | 0  | 0  | 0                | 1.00     | 1.00 | 1.00 | 1.00 | 1.00 |
| 20 ng | 10  | 50 | 0  | 0  | 0                | 1.00     | 1.00 | 1.00 | 1.00 | 1.00 |
| 15 ng | 10  | 50 | 0  | 0  | 0                | 1.00     | 1.00 | 1.00 | 1.00 | 1.00 |
| 10 ng | 10  | 50 | 0  | 0  | 0                | 1.00     | 1.00 | 1.00 | 1.00 | 1.00 |
| Input | RNA |    |    |    |                  | Accuracy | PPA  | NPA  | PPV  | NPV  |
|       | TP  | TN | FP | FN | Excluded         |          |      |      |      |      |
| 20 ng | 3   | 27 | 0  | 0  | 0                | 1.00     | 1.00 | 1.00 | 1.00 | 1.00 |
| 10 ng | 3   | 27 | 0  | 0  | 0                | 1.00     | 1.00 | 1.00 | 1.00 | 1.00 |
| 7.5ng | 3   | 27 | 0  | 0  | 0                | 1.00     | 1.00 | 1.00 | 1.00 | 1.00 |
| 5 ng  | 3   | 22 | 0  | 0  | 5<br>(1 Samples) | 1.00     | 1.00 | 1.00 | 1.00 | 1.00 |

**Table S5 Institutional Review Board Statement.** Samples from Lykos Lab are IRB exempt under IRB 223081.

| IRB/Ethic Committee Name                  | Protocol/IRB # | Approval Date |
|-------------------------------------------|----------------|---------------|
| BioChain Institute Inc. IRB #1—Biomedical | IRB00008283    | 6/9/21        |
| Vanderbilt University IRB                 | IRB 010294     | 10/15/22      |
| Advarra IRB                               | CR00425931     | 3/6/23        |
|                                           | Pro00051469    | 3/6/23        |
